# Supplementary material
Source: PubMed Central journal article supplement (PMC9256639)
Supplement: mmc1.pdf [file mmc1.pdf]

## Supplementary material

### Table of contents

**Supplementary Information File 1.** The distribution of SARS-CoV-2 variants in Europe during the six pandemic waves recorded in Serbia, March 6, 2020 - January 31, 2022. (Nextstrain naming was used).

**Supplementary Information Table 1.** SARS-CoV-2 tests performed by assay type in Vojvodina, Serbia, March 6, 2020-January 31, 2022.

**Supplementary Information Table 2.** Characteristics of patients with death outcome caused by SARS CoV-2 reinfections, in Vojvodina, Serbia, March 6, 2020 - January 31,2022.

**Supplementary Information Table 3.** Characteristics of patients with three consecutive SARS-CoV-2 infections in Vojvodina, Serbia, March 6, 2020 - January 31, 2022.

**Supplementary information Table 4.** Characteristics of study cases (reinfected with SARS-CoV-2) and control participants (who were not reinfected) in Vojvodina, Serbia, January 1, 2021 - January 31, 2022.

**Supplementary information Table 5.** Association of SARS-CoV-2 reinfection with COVID-19 vaccination status of study cases and controls, Vojvodina, Serbia, January 1, 2021 - January 31, 2022.

**Supplementary information Figure 1.** Flow chart summarizing the study design.

**Supplementary information Figure 2.** The proportion of primary infections that were reinfected in Vojvodina, Serbia, March 6, 2020 - October 31, 2021.

**Supplementary information Figure 3.** Kaplan-Meier curve showing the cumulative probability of death in the overall cohort (A) and for the patients with reinfection (B) in Vojvodina, Serbia, March 2020 - January 2022.

**Supplementary Information File 1.** The distribution of SARS-CoV-2 variants in Europe during the six pandemic waves recorded in Serbia, March 6, 2020-January 31, 2022. (Nextstrain naming was used).

1. **First pandemic wave** (March 6-June 1, 2020): 19A, 19B, 20A, 20B, 20C, 20D.
2. **Second pandemic wave** (June 2-October 6, 2020): 19B, 20A, 20B, 20C, 20D, 20E (EU1).
3. **Third pandemic wave** (October 7, 2020-January 31, 2021): 19B, 20A, 20B, 20C, 20D, 20E (EU1), 20H (Beta, V2), 20I (Alpha, V1), 21C (Epsilon), 21D (Eta).
4. **Fourth pandemic wave** (February 1-July 23, 2021): 19B, 20A, 20B, 20C, 20D, 20E (EU1), 20H (Beta, V2), 20I (Alpha, V1), 20J (Gamma, V3), 21A (Delta), 21I (Delta), 21J (Delta), 21B (Kappa), 21D (Eta), 21G (Lambda).
5. **Fifth pandemic wave** (July 24-December 31, 2021): 19B, 20A, 20B, 20C, 20E (EU1), 20I (Alpha, V1), 20J (Gamma, V3), 21A (Delta), 21I (Delta), 21J (Delta), 21H (Mu), 21K (Omicron), 21L (Omicron).
6. **Sixth pandemic wave** (January-February 2022): 21I (Delta), 21J (Delta), 21K (Omicron), 21L (Omicron).

**Supplementary Table 1.** SARS-CoV-2 tests performed by assay type in Vojvodina, Serbia, March 6, 2020-January 31, 2022.

|              | Months           | RT-PCR tests   |            | Ag-RDTs          |            | Overall tests    |            |
|--------------|------------------|----------------|------------|------------------|------------|------------------|------------|
|              |                  | n              | %          | n                | %          | n                | %          |
| 2020         | March-June       | 22,321         | 7.35       | 0                | 0          | 22,321           | 1.40       |
|              | July-September   | 26,880         | 8.85       | 0                | 0          | 26,880           | 1.69       |
|              | October-December | 45,538         | 15.00      | 166,256          | 12.92      | 211,794          | 13.32      |
|              | <b>Total</b>     | <b>94,739</b>  | <b>-</b>   | <b>166,256</b>   | <b>-</b>   | <b>260,995</b>   | <b>-</b>   |
| 2021         | January-March    | 39,831         | 13.11      | 244,117          | 18.98      | 283,948          | 17.86      |
|              | April-June       | 34,015         | 11.20      | 142,940          | 11.11      | 176,955          | 11.13      |
|              | July-September   | 28,244         | 9.30       | 173,287          | 13.47      | 201,531          | 12.67      |
|              | October-December | 74,240         | 24.45      | 337,368          | 26.23      | 411,608          | 25.89      |
|              | <b>Total</b>     | <b>176,330</b> | <b>-</b>   | <b>897,712</b>   | <b>-</b>   | <b>1,074,042</b> | <b>-</b>   |
| 2022         | January          | 32,623         | 10.74      | 222,418          | 17.29      | 255,041          | 16.04      |
| <b>Total</b> |                  | <b>303,692</b> | <b>100</b> | <b>1,286,386</b> | <b>100</b> | <b>1,590,078</b> | <b>100</b> |

**Supplementary Table 2.** Characteristics of patients with death outcome caused by SARS CoV-2 reinfections, in Vojvodina, Serbia, March 6, 2020 - January 31,2022.

| Gender | Age at reinfection (years) | Time between first infection and death (days) | Disease severity |             | Hospitalization |             | Pandemic wave*  |             |
|--------|----------------------------|-----------------------------------------------|------------------|-------------|-----------------|-------------|-----------------|-------------|
|        |                            |                                               | First infection  | Reinfection | First infection | Reinfection | First infection | Reinfection |
| Female | 75                         | 426                                           | severe           | critical    | yes             | yes         | 2               | 5           |
| Female | 51                         | 127                                           | critical         | critical    | yes             | yes         | 2               | 3           |
| Male   | 67                         | 553                                           | severe           | severe      | yes             | yes         | 2               | 6           |
| Male   | 45                         | 110                                           | severe           | critical    | yes             | yes         | 3               | 4           |
| Male   | 73                         | 371                                           | severe           | critical    | yes             | yes         | 3               | 5           |
| Male   | 83                         | 406                                           | mild             | severe      | no              | yes         | 3               | 6           |
| Male   | 60                         | 367                                           | severe           | severe      | yes             | yes         | 3               | 5           |
| Female | 62                         | 352                                           | severe           | severe      | yes             | yes         | 3               | 5           |
| Male   | 75                         | 106                                           | severe           | severe      | yes             | yes         | 3               | 4           |
| Female | 72                         | 266                                           | severe           | severe      | yes             | yes         | 3               | 5           |
| Male   | 88                         | 227                                           | mild             | severe      | no              | yes         | 4               | 5           |
| Female | 37                         | 219                                           | mild             | severe      | no              | yes         | 4               | 5           |
| Female | 66                         | 191                                           | mild             | severe      | no              | yes         | 4               | 5           |
| Male   | 47                         | 279                                           | mild             | severe      | no              | yes         | 4               | 5           |
| Female | 58                         | 269                                           | severe           | severe      | yes             | yes         | 4               | 5           |
| Male   | 65                         | 186                                           | severe           | severe      | yes             | yes         | 4               | 5           |
| Female | 64                         | 280                                           | mild             | severe      | no              | no          | 4               | 6           |
| Male   | 87                         | 264                                           | mild             | severe      | no              | yes         | 4               | 6           |
| Male   | 40                         | 258                                           | critical         | critical    | yes             | yes         | 4               | 6           |
| Male   | 73                         | 91                                            | mild             | severe      | no              | yes         | 5               | 6           |

\* Duration of pandemic waves: Second wave (June 2-October 6, 2020); Third wave (October 7, 2020-January 31, 2021); Fourth wave (February 1-July 23, 2021); Fifth wave (July 24-December 31, 2021); Sixth wave (January-February 2022).

**Supplementary Table 3.** Characteristics of patients with three consecutive SARS-CoV-2 infections in Vojvodina, Serbia, March 6, 2020-January 31, 2022.

| Characteristics                | Thrice infected with SARS-CoV-2 |              |
|--------------------------------|---------------------------------|--------------|
|                                | n                               | %            |
| <b>Age (years)</b>             |                                 |              |
| 0-9                            | 0                               | 0.0          |
| 10-19                          | 1                               | 2.9          |
| 20-29                          | 6                               | 17.7         |
| 30-39                          | 8                               | 23.5         |
| 40-49                          | 8                               | 23.5         |
| 50-59                          | 8                               | 23.5         |
| ≥60                            | 3                               | 8.9          |
| <b>Gender</b>                  |                                 |              |
| Male                           | 11                              | 32.3         |
| Female                         | 23                              | 67.7         |
| <b>Severity</b>                |                                 |              |
| Mild                           | 34                              | 100.0        |
| <b>Profession</b>              |                                 |              |
| HCWs <sup>a</sup>              | 9                               | 26.5         |
| Non-HCWs <sup>b</sup>          | 25                              | 73.5         |
| <b>Number of comorbidities</b> |                                 |              |
| 0                              | 33                              | 97.1         |
| 1                              | 1                               | 2.9          |
| <b>Vaccination status</b>      |                                 |              |
| Unvaccinated                   | 19                              | 55.9         |
| Partially vaccinated           | 8                               | 23.5         |
| Fully vaccinated               | 4                               | 11.8         |
| Boosted                        | 3                               | 8.8          |
| <b>Total</b>                   | <b>34</b>                       | <b>100.0</b> |

<sup>a</sup> Health-care-workers (HCWs); <sup>b</sup> other occupations except HCWs.

**Supplementary Table 4.** Characteristics of study cases (reinfected with SARS-CoV-2) and control participants (who were not reinfected) in Vojvodina, Serbia, January 1, 2021–January 31, 2022.

| Characteristic                            | Study cases <sup>a</sup><br>(n=7,071) |      | Controls<br>(n=14,142) |      |
|-------------------------------------------|---------------------------------------|------|------------------------|------|
|                                           | n                                     | %    | n                      | %    |
| <b>Age group (years)</b>                  |                                       |      |                        |      |
| 18-29                                     | 1,108                                 | 15.7 | 2,293                  | 16.2 |
| 30-39                                     | 2,036                                 | 28.8 | 3,873                  | 27.4 |
| 40-49                                     | 1,855                                 | 26.2 | 3,712                  | 26.2 |
| 50-59                                     | 1,259                                 | 17.8 | 2,552                  | 18.0 |
| 60-69                                     | 586                                   | 8.3  | 1,261                  | 8.9  |
| 70-79                                     | 179                                   | 2.5  | 354                    | 2.5  |
| ≥80                                       | 48                                    | 0.7  | 97                     | 0.7  |
| <b>Gender</b>                             |                                       |      |                        |      |
| Male                                      | 3,057                                 | 43.2 | 6,114                  | 43.2 |
| Female                                    | 4,014                                 | 56.8 | 8,028                  | 56.8 |
| <b>Occupation</b>                         |                                       |      |                        |      |
| Healthcare workers (HCWs)                 | 1,021                                 | 14.4 | 1,510                  | 10.7 |
| Non-HCWs <sup>b</sup>                     | 6,050                                 | 85.6 | 12,632                 | 89.3 |
| <b>Number of comorbidities</b>            |                                       |      |                        |      |
| 0                                         | 5,715                                 | 80.8 | 10,951                 | 77.4 |
| 1                                         | 1,071                                 | 15.1 | 2,476                  | 17.5 |
| 2                                         | 225                                   | 3.2  | 555                    | 3.9  |
| ≥3                                        | 60                                    | 0.8  | 160                    | 1.1  |
| <b>Month of initial infection in 2020</b> |                                       |      |                        |      |
| March                                     | 0                                     | 0.0  | 0                      | 0.0  |
| April                                     | 13                                    | 0.2  | 26                     | 0.2  |
| May                                       | 2                                     | 0.0  | 1                      | 0.0  |
| June                                      | 44                                    | 0.6  | 93                     | 0.7  |
| July                                      | 268                                   | 3.8  | 534                    | 3.8  |
| August                                    | 86                                    | 1.2  | 173                    | 1.2  |
| September                                 | 23                                    | 0.3  | 41                     | 0.3  |
| October                                   | 170                                   | 2.4  | 352                    | 2.5  |
| November                                  | 3,198                                 | 45.2 | 6852                   | 48.5 |
| December                                  | 3,267                                 | 46.2 | 6070                   | 42.9 |

<sup>a</sup> Each individual study case was matched to a control appropriate for age ( $\pm 3$  years), gender, and date of testing ( $\pm 10$  days).

<sup>b</sup> Non-HCWs included professions that provide various services (e.g. caregivers, waiters), other employment categories as well as retired individuals.

**Supplementary Table 5.** Association of SARS-CoV-2 reinfection with COVID-19 vaccination status of study cases and controls, Vojvodina, Serbia, January 1, 2021-January 31, 2022.

| Vaccination status             | Study cases<br>(n=7,071) | Controls<br>(n=14,142) | OR* (95% CI)#     | p-value |
|--------------------------------|--------------------------|------------------------|-------------------|---------|
|                                | n (%)                    | n (%)                  |                   |         |
| <b>Unvaccinated</b>            | 3,667 (51.9)             | 7,326 (51.8)           | 1.23 (1.14, 1.33) | <0.001  |
| <b>Incompletely vaccinated</b> | 148 (2.1)                | 276 (2.0)              | 1.33 (1.08, 1.64) | 0.008   |
| <b>Fully vaccinated</b>        | 1,747 (24.7)             | 2,874 (20.3)           | 1.50 (1.37, 1.63) | <0.001  |
| <b>Boosted</b>                 | 1,509 (21.3)             | 3,666 (25.9)           | Reference group   |         |

\*OR: odds ratio; CI: confidence interval.

ORs >1 mean that there are greater odds for reinfection in exposed (unvaccinated, incompletely, and fully vaccinated) groups compared to the reference (boosted) group.

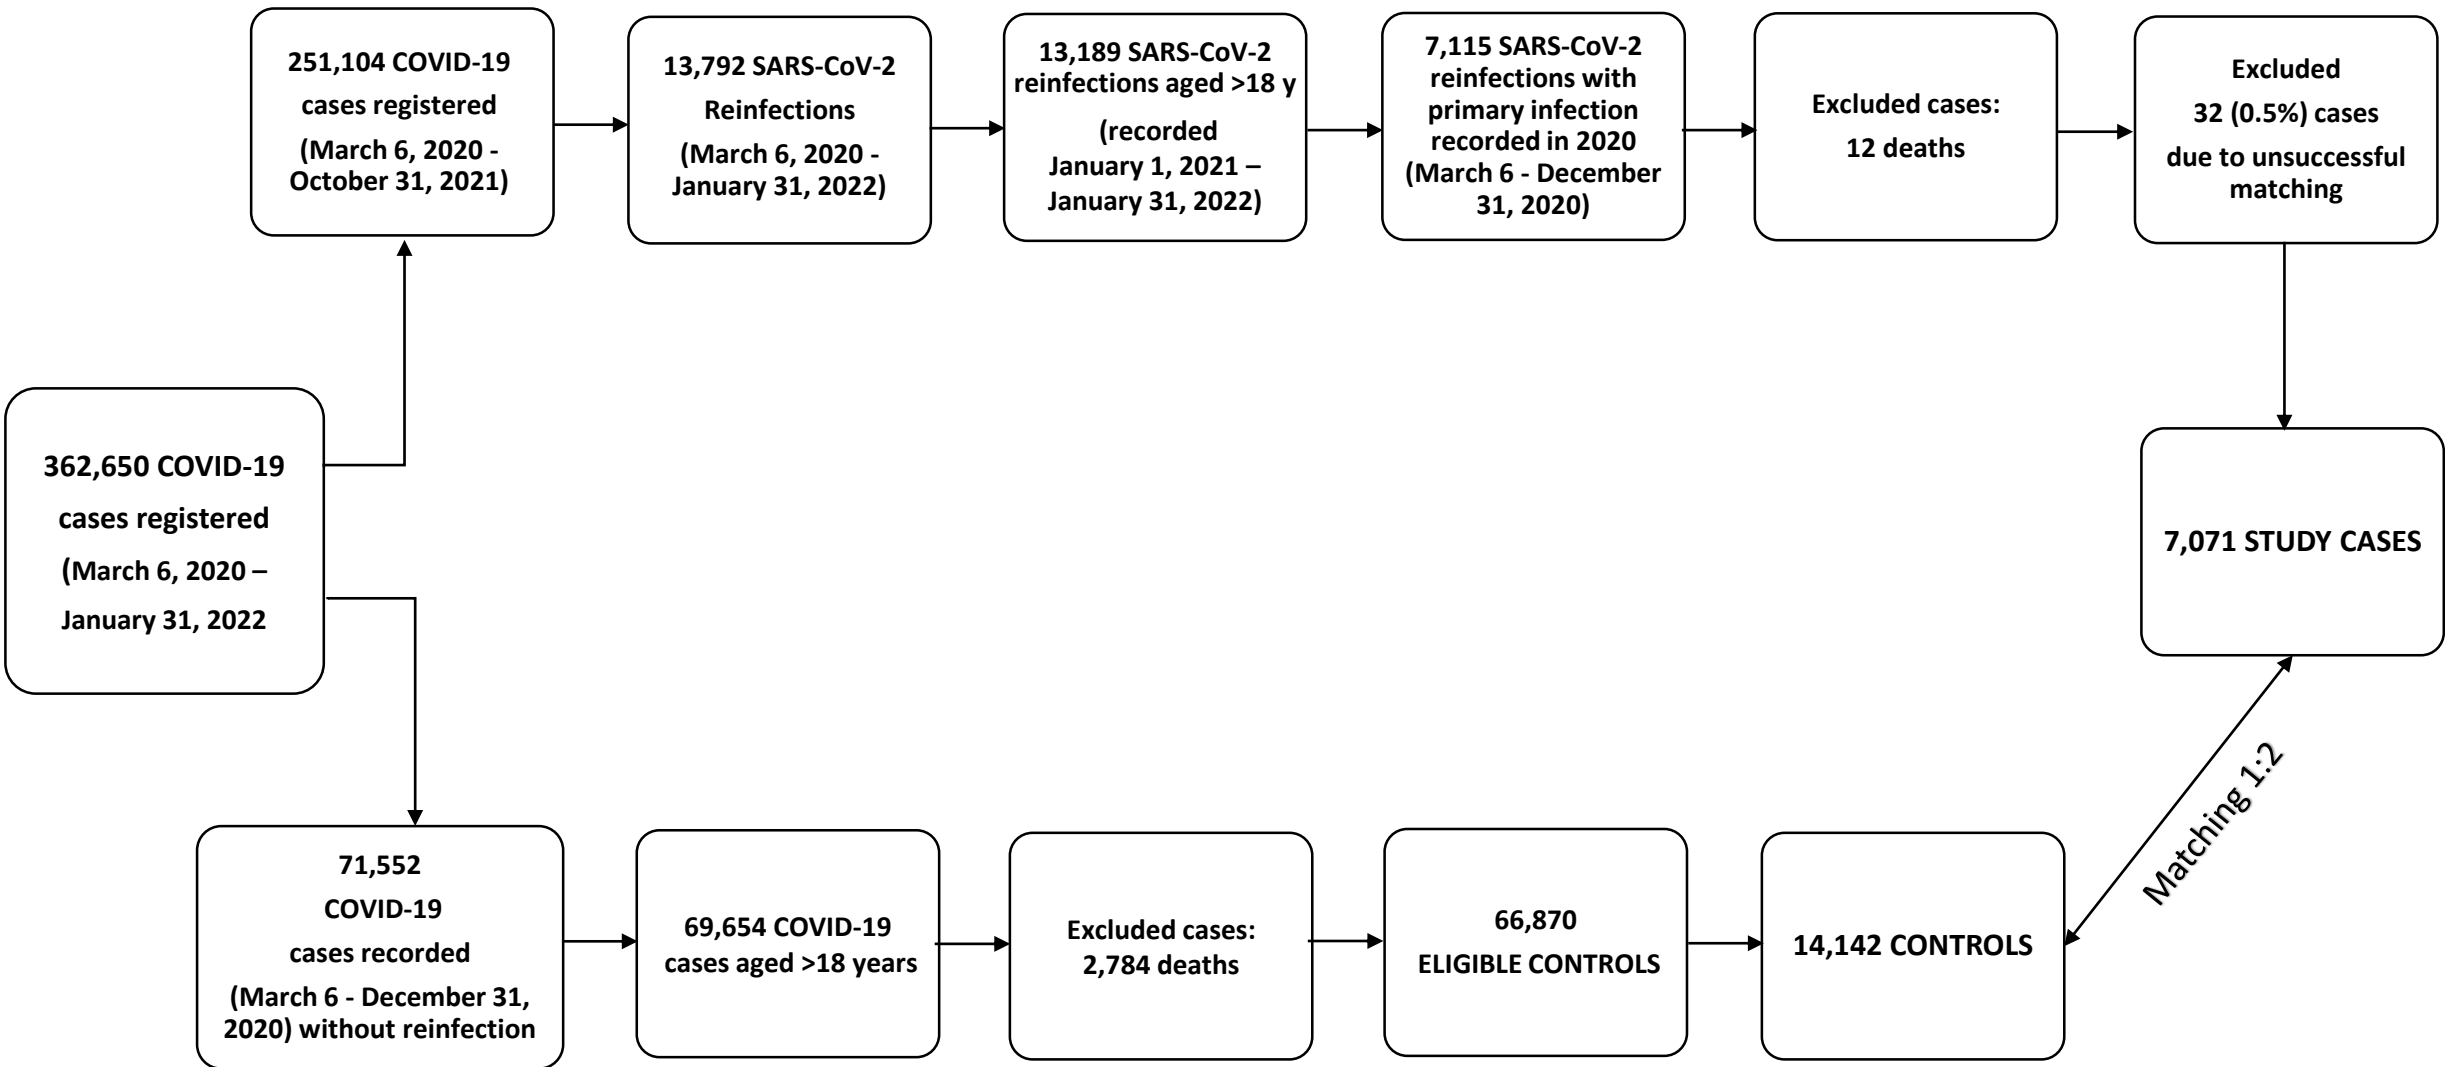

Supplementary Figure 1. Flow chart summarizing the study design.



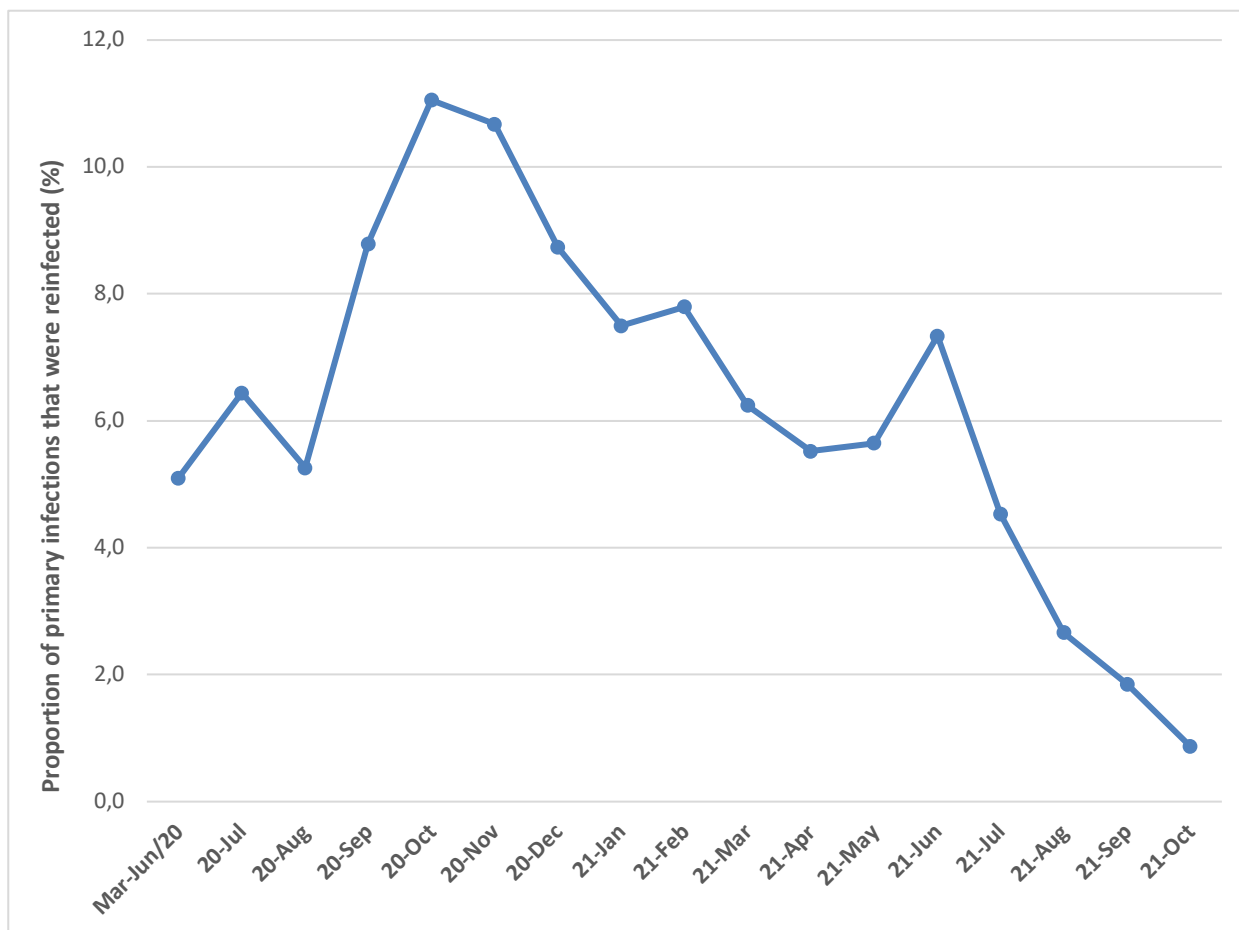

**Supplementary Figure 2.** The proportion of primary infections that were reinfected in Vojvodina, Serbia, March 6, 2020–October 31, 2021. The Cochran–Armitage test was applied.

(A)

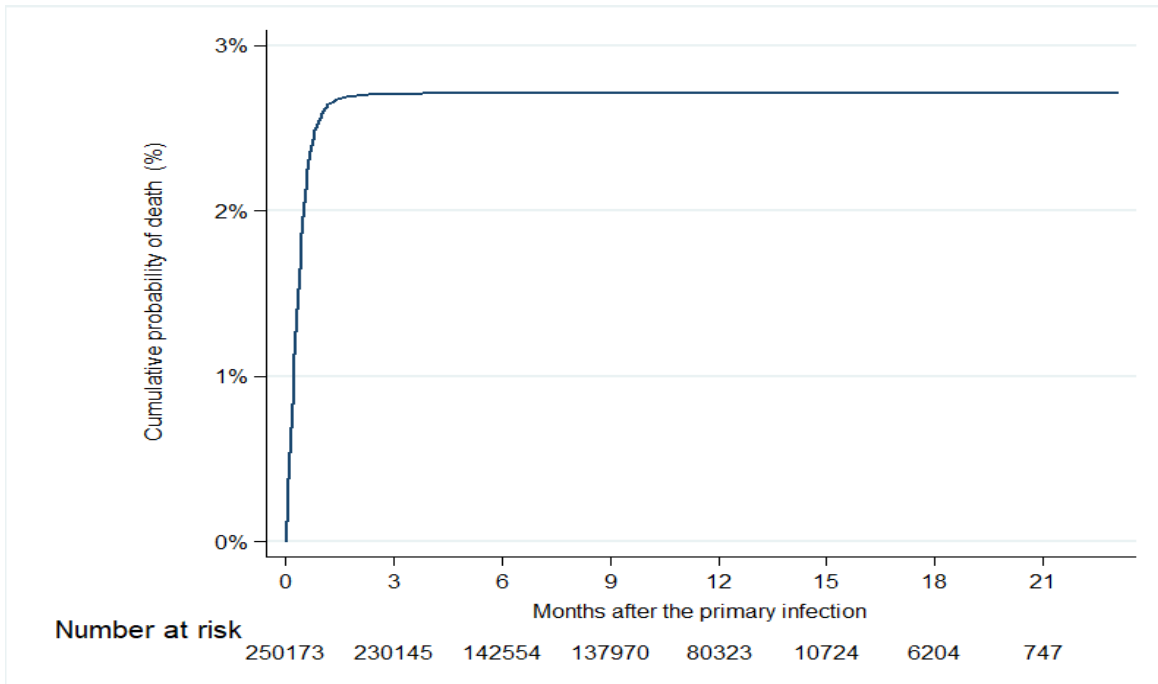

(B)

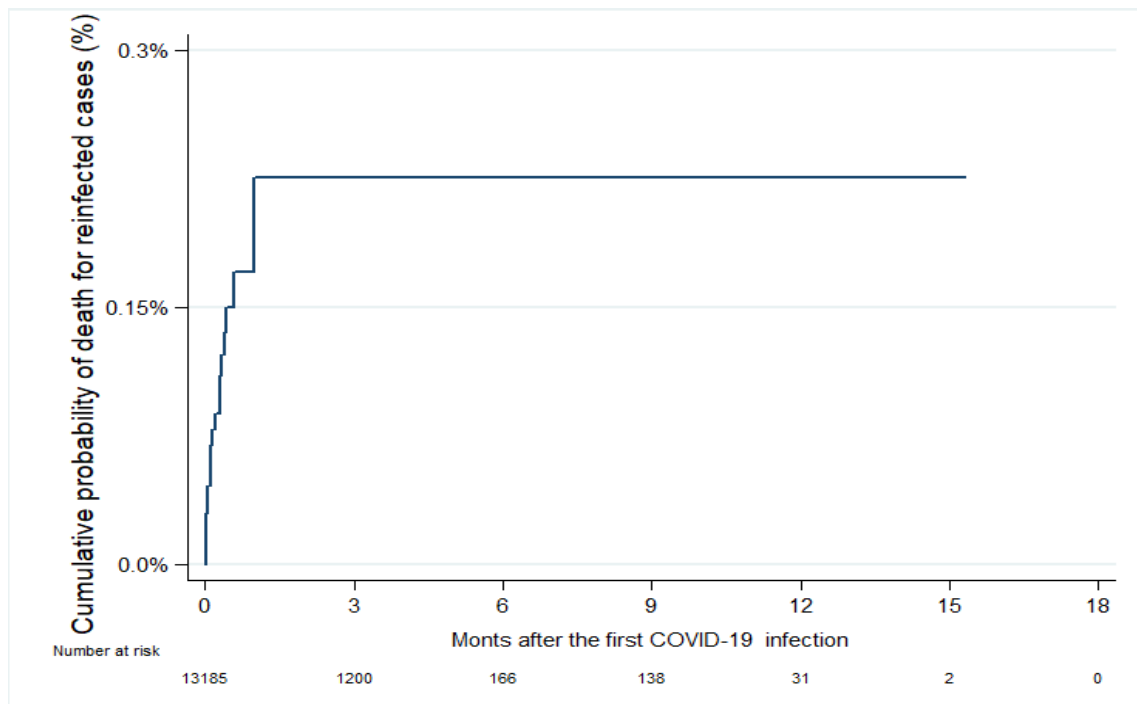

**Supplementary Figure 3.** Kaplan-Meier curve showing the cumulative probability of death in the overall cohort (A) and for the patients with reinfection (B) in Vojvodina, Serbia, March 2020-January 2022.
